# THE AMERICAN JOURNAL OF PSYCHIATRY

---

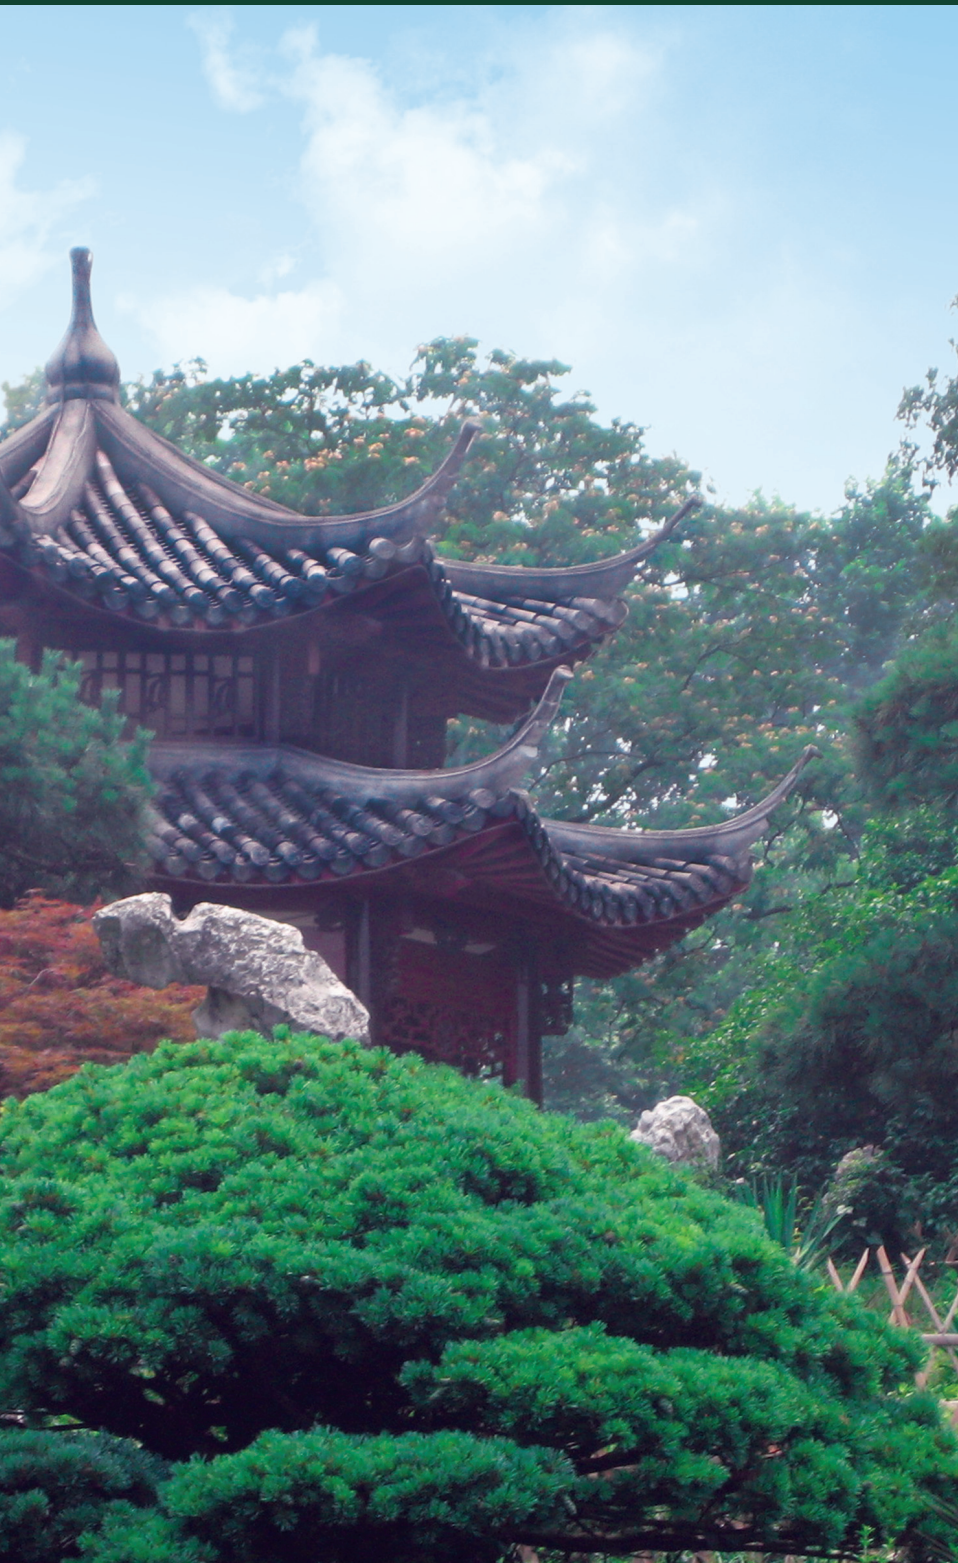

**The Development of the  
Feighner Criteria:  
A Historical Perspective**  
Kenneth S. Kendler, M.D., et al. 134

**Suicide in HIV-Infected  
Individuals and the General  
Population in Switzerland,  
1988–2008**  
Olivia Keiser, Ph.D., et al. 143

**Static and Dynamic Cognitive  
Deficits in Childhood Preceding  
Adult Schizophrenia:  
A 30-Year Study**  
Abraham Reichenberg, Ph.D., et al. 160

**Association of FKBP5  
Polymorphisms With Suicidal  
Events in the Treatment of  
Resistant Depression in  
Adolescents (TORDIA) Study**  
David Brent, M.D., et al. 190

**Continuing Medical Education** 235

**February 2010**  
**Volume 167 • Number 2**

---

Official Journal of the  
AMERICAN PSYCHIATRIC ASSOCIATION

---

[ajp.psychiatryonline.org](http://ajp.psychiatryonline.org)
