# THE AMERICAN JOURNAL OF PSYCHIATRY

## EDITOR-IN-CHIEF

Robert Freedman, M.D.

## DEPUTY EDITORS

David A. Lewis, M.D.

Robert Michels, M.D.

Daniel S. Pine, M.D.

Susan K. Schultz, M.D.

Carol A. Tamminga, M.D.

## EDITORIAL STAFF

**Editorial Director**  
Michael D. Roy

**Senior Editor/Features Writer**  
Jane Weaver, E.L.S.

**Senior Editor**  
John J. Guardiano, Ph.D.

**Production Manager**  
Julie C. Blair

**Graphic Designer**  
Steve Hennessey

**Assistant Editor**  
Angela Moore

**Editorial Support Services  
Manager**  
Kourtney Skinner

**Editorial Assistant**  
Samantha Luck

**Administrative Assistant**  
Victoria Chihos

**Assistants to the Editors**  
Lois Lilienthal  
Laura Friedrich  
Rachel Hogg  
Russell A. Scholl

## ASSOCIATE EDITORS

Kathleen T. Brady, M.D., Ph.D.

David A. Brent, M.D.

Linda Brzustowicz, M.D.

Cameron S. Carter, M.D.

Howard H. Goldman, M.D., Ph.D.

Daniel C. Javitt, M.D.

Bankole Johnson, M.D.

Ellen Leibenluft, M.D.

Jeffrey A. Lieberman, M.D.

Barbara Milrod, M.D.

Maria A. Oquendo, M.D.

Jerrold F. Rosenbaum, M.D.

A. John Rush, M.D.

Larry J. Siever, M.D.

Patricia Suppes, M.D., Ph.D.

Myrna M. Weissman, Ph.D.

## EDITOR EMERITA

Nancy C. Andreasen, M.D., Ph.D.

## FORMER EDITORS

Amariah Brigham, M.D.  
1844-1849

T. Romeyn Beck, M.D.  
1849-1854

John P. Gray, M.D.  
1854-1886

G. Alder Blumer, M.D.  
1886-1894

Richard Dewey, M.D.  
1894-1897

Henry M. Hurd, M.D.  
1897-1904

Edward N. Brush, M.D.  
1904-1931

Clarence B. Farrar, M.D.  
1931-1965

Francis J. Braceland, M.D.  
1965-1978

John C. Nemiah, M.D.  
1978-1993

The American Journal of Psychiatry in online at [ajp.psychiatryonline.org](http://ajp.psychiatryonline.org)

# THE AMERICAN PSYCHIATRIC ASSOCIATION

1000 Wilson Blvd., Suite 1825, Arlington, VA 22209-3901  
(888) 357-7924 (toll-free inside the U.S. and Canada) / (703) 907-7300  
web site: [www.psych.org/](http://www.psych.org/) e-mail: [apa@psych.org](mailto:apa@psych.org)

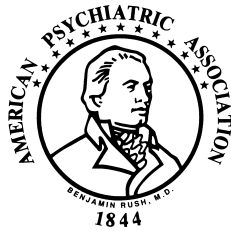

## OFFICERS 2009–2010

|                     |                                 |
|---------------------|---------------------------------|
| President           | Alan F. Schatzberg, M.D.        |
| President-Elect     | Carol A. Bernstein, M.D.        |
| Vice-President      | Jeffrey L. Geller, M.D., M.P.H. |
| Secretary-Treasurer | David Fassler, M.D.             |

## ASSEMBLY

|               |                           |
|---------------|---------------------------|
| Speaker       | Gary S. Weinstein, M.D.   |
| Speaker-Elect | Bruce A. Hershfield, M.D. |
| Recorder      | Ann Marie Sullivan, M.D.  |

## MEDICAL DIRECTOR'S OFFICE

|                          |                            |
|--------------------------|----------------------------|
| Medical Director and CEO | James H. Scully, Jr., M.D. |
|--------------------------|----------------------------|

## BOARD OF TRUSTEES

|                           |                                  |
|---------------------------|----------------------------------|
| Becky Bay, M.D.           | Carolyn B. Robinowitz, M.D.      |
| Thomas K. Ciesla, M.D.    | Pedro Ruiz, M.D.                 |
| Mary Helen Davis, M.D.    | Jacqueline N. Smith, M.D.        |
| Melinda G. Fierros, M.D.  | Joyce A. Spurgeon, M.D.          |
| Dilip V. Jeste, M.D.      | Frederick J. Stoddard, Jr., M.D. |
| James E. Ninninger, M.D.  | Nada L. Stotland, M.D., M.P.H.   |
| Roger Peele, M.D.         | John Chapman Urbaitis, M.D.      |
| Kayla M. Pope, M.D., J.D. | John J. Wernert III, M.D.        |
|                           | William M. Womack, M.D.          |

# THE AMERICAN PSYCHIATRIC ASSOCIATION

## Chairpersons of Councils, Commissions, Committees, and Task Forces

### Standing Committees

---

#### Bylaws

John O. Gaston, M.D.

#### Elections

Kathleen M. Mogul, M.D.

#### Ethics

Wade C. Myers, M.D.

#### Finance and Budget

Frank W. Brown, M.D.

#### Audit

David Fassler, M.D.

#### Investment Oversight

Larry R. Faulkner, M.D.

#### Joint Reference

Carol A. Bernstein, M.D.

#### Membership

Joseph Ezra V. Rubin, M.D.

#### Nominating

Nada Stotland, M.D., M.P.H.

#### Tellers

Eliot Sorel, M.D.

### Council on Adult Psychiatry

---

Thomas N. Wise, M.D.

### Council on Advocacy and Government Relations

---

Robert Paul Cabaj, M.D.

#### Advocacy and Litigation Funding

Jeffrey L. Metzner, M.D.

### Council on Children, Adolescents, and Their Families

---

Michael Houston, M.D.

#### Agnes Purcell McGavin Award

John E. Schowalter, M.D.

#### Blanche F. Ittleson Research Award

### Council on Communications

---

Jeffrey A. Borenstein

### Council on Healthcare Systems and Financing

---

Anita Smith Everett, M.D.

#### APA/Business Relations

Stephen H. Heidel, M.D.

#### Reimbursement for Psychiatric Care

Joseph T. English, M.D.

#### RBRVS, Codes and Reimbursement

Ronald M. Burd, M.D.

### Council on Medical Education and Lifelong Learning

---

Sandra Sexson, M.D.

#### APA/SAMHSA Minority Fellowship Selection and Advisory

Maria A. Oquendo, M.D.

#### Joint Sponsorship of Continuing Medical Education (CME)

Adam T. Kaul, M.D.

#### Scientific Program

Julio Licino, M.D.

#### Scientific Program Committee of the Institute on Psychiatric Services

Stephen M. Goldfinger, M.D.

#### Task Force to Update the Ethics Annotations

Laura W. Roberts, M.D.

#### Vestermark Award

Frederick G. Guggenheim, M.D.

### Council on Minority Health and Health Disparities

---

Sandra C. Walker, M.D.

### Council on Psychiatry And Law

---

Patricia R. Recupero, M.D., J.D.

#### Isaac Ray Award

Renee L. Binder, M.D.

#### Judicial Action

Jeffrey S. Janofsky, M.D.

#### Manfred S. Guttmacher Award

Marilyn Price, M.D., C.M.

### Council on Research and Quality Care

---

Jeffrey A. Lieberman, M.D.

#### Electronic Health Records

Laura J. Fochtman, M.D.

#### Research Awards

Stuart C. Yudofsky, M.D.

#### Steering Committee on Practice Guidelines

Joel Yager, M.D.

#### Task Force on DSM-V

David J. Kupfer, M.D.

#### Task Force on Gender Identity Disorder

William M. Byne

#### Task Force to Revise the Practice of Electroconvulsive Therapy

Sarah H. Lisanby
